# Supplementary material for: The Pharmacodynamics of the p53-Mdm2 Targeting Drug Nutlin: The Role of Gene-Switching Noise
Source: PubMed Central journal article supplement (PMC4263360; doi:10.1371/journal.pcbi.1003991), 2014-12-11
Supplement: pcbi.1003991.s001.pdf [file pcbi.1003991.s001.pdf]

# Supporting Information file S1

October 28, 2014

## S1. Dynamics of p53 regulation

In this supplementary material file, we write the ordinary differential equations that, together with those described in the main text, rule the deterministic dynamics of all involved macromolecular species. We recall that the deterministic part of our model is coupled to the stochastic processes  $G_{P53}(t)$ ,  $G_{MDM}(t)$ , and  $G_{PTEN}(t)$  (see Section 2.1 of the main text), and *vice-versa*. Below we summarize the variables of the mathematical model. Apart from  $N$ , which is a concentration, the other symbols denote the intracellular number of molecules of the corresponding chemical species.

- $N$  - Nutlin extracellular concentration
- $NUT$  - intracellular Nutlin
- $P53_{RNA}$  - p53 transcript
- $MDM_{RNA}$  - Mdm2 transcript
- $PTEN_{RNA}$  - PTEN transcript
- $MDM$  - cytoplasmic Mdm2
- $MDM_p$  - phosphorylated cytoplasmic Mdm2
- $MDM_{pn}$  - phosphorylated nuclear Mdm2
- $MDM_i$  - cytoplasmic Mdm2 inactivated by Nutlin binding
- $MDM_{pi}$  - phosphorylated cytoplasmic Mdm2 inactivated by Nutlin binding
- $MDM_{pni}$  - phosphorylated nuclear Mdm2 inactivated by Nutlin binding
- $P53_n$  - unphosphorylated nuclear p53 dimers
- $P53_{pn}$  - phosphorylated nuclear p53 dimers
- $P53_n|MDM_{pn}$  - complex between MDM2pn and unphosphorylated nuclear p53 dimers
- $P53_{pn}|MDM_{pn}$  - complex between MDM2pn and phosphorylated nuclear p53 dimers
- $P53_n^u$  - single-ubiquitinated unphosphorylated nuclear p53 dimers
- $P53_n^{uu}$  - double-ubiquitinated unphosphorylated nuclear p53 dimers
- $P53_{pn}^u$  - single-ubiquitinated phosphorylated nuclear p53 dimers
- $P53_{pn}^{uu}$  - double-ubiquitinated phosphorylated nuclear p53 dimers

- $P53_n^u|MDM_{pn}$  - complex between MDM2pn and single-ubiquitinated unphosphorylated nuclear p53 dimers
- $P53_{pn}^u|MDM_{pn}$  - complex between MDM2pn and single-ubiquitinated phosphorylated nuclear p53 dimers
- $PTEN$  - cytoplasmic PTEN
- $PIP_p$  - phosphorylated PIP3
- $PIP_{tot}$  - unphosphorylated + phosphorylated PIP3
- $AKT_p$  - phosphorylated Akt
- $AKT_{tot}$  - unphosphorylated + phosphorylated Akt

## Equations of p53-Mdm2 module

*p53 transcript.* Transcription – degradation:

$$\frac{d}{dt}P53_{RNA}(t) = s_2G_{P53}(t) - d_8P53_{RNA}(t). \quad (1)$$

*Mdm2 transcript.* Transcription – degradation:

$$\frac{d}{dt}MDM_{RNA}(t) = s_0G_{MDM}(t) - d_6MDM_{RNA}(t). \quad (2)$$

*Nuclear p53.* Translation + dephosphorylation – phosphorylation + Mdm2-p53 complex dissociation – Mdm2-p53 complex formation – degradation + deubiquitination of mono-ubiquitinated p53:

$$\begin{aligned} \frac{d}{dt}P53_n(t) &= t_2P53_{RNA}(t) + c_0P53_{pn}(t) - a_0P53_n(t) + k_{d_1}P53_n|MDM_{pn}(t) \\ &\quad - k_{a_1}MDM_{pn}(t)P53_n(t) - d_2P53_n(t) + k_{d_u}P53_n^u(t). \end{aligned} \quad (3)$$

*Nuclear phospho-p53.* Phosphorylation – dephosphorylation – degradation – Mdm2-p53 complex formation + Mdm2-p53 complex dissociation + deubiquitination of mono-ubiquitinated phospho-p53:

$$\begin{aligned} \frac{d}{dt}P53_{pn}(t) &= a_0P53_n(t) - c_0P53_{pn}(t) - d_3P53_{pn}(t) - k_{a_2}MDM_{pn}(t)P53_{pn}(t) \\ &\quad + k_{d_1}P53_{pn}|MDM_{pn}(t) + k_{d_u}P53_{pn}^u(t). \end{aligned} \quad (4)$$

*Complex between p53 and nuclear phospho-Mdm2.* Complex formation – complex dissociation (with or without ubiquitination):

$$\frac{d}{dt}P53_n|MDM_{pn}(t) = k_{a_1}MDM_{pn}(t)P53_n(t) - (k_u + k_{d_1})P53_n|MDM_{pn}(t). \quad (5)$$

*Complex between phospho-p53 and nuclear phospho-Mdm2.* Complex formation – complex dissociation (with or without ubiquitination):

$$\frac{d}{dt}P53_{pn}|MDM_{pn}(t) = k_{a_2}MDM_{pn}(t)P53_{pn}(t) - (k_u + k_{d_1})P53_{pn}|MDM_{pn}(t). \quad (6)$$

*Complex between mono-ubiquitinated p53 and nuclear phospho-Mdm2.* Complex formation – complex dissociation (with or without ubiquitination):

$$\frac{d}{dt}P53_n^u|MDM_{pn}(t) = k_{a_1}MDM_{pn}(t)P53_n^u(t) - (k_u + k_{d_1})P53_n^u|MDM_{pn}(t). \quad (7)$$

*Complex between mono-ubiquitinated phospho-p53 and nuclear phospho-Mdm2.* Complex formation – complex dissociation (with or without ubiquitination):

$$\frac{d}{dt}P53_{pn}^u|MDM_{pn}(t) = k_{a_2}MDM_{pn}(t)P53_{pn}^u(t) - (k_u + k_{d_1})P53_{pn}^u|MDM_{pn}(t). \quad (8)$$

*Mono-ubiquitinated p53.* Mdm2-p53 complex dissociation with ubiquitination + mono-ubiquitinated p53 with nuclear phospho-Mdm2 complex dissociation without ubiquitination + deubiquitination of double-ubiquitinated p53 + dephosphorylation – phosphorylation – mono-ubiquitinated p53 with nuclear phospho-Mdm2 complex formation – degradation – deubiquitination:

$$\begin{aligned} \frac{d}{dt}P53_n^u(t) &= k_uP53_n|MDM_{pn}(t) + k_{d_1}P53_n^u|MDM_{pn}(t) + k_{d_u}P53_n^{uu}(t) + c_0P53_{pn}^u(t) \\ &- a_0P53_n^u(t) - k_{a_1}MDM_{pn}(t)P53_n^u(t) - d_4P53_n^u(t) - k_{d_u}P53_n^u(t). \end{aligned} \quad (9)$$

*Mono-ubiquitinated phospho-p53.* Mdm2-phospho-p53 complex dissociation with ubiquitination + mono-ubiquitinated phospho-p53 with nuclear phospho-Mdm2 complex dissociation without ubiquitination + deubiquitination of double-ubiquitinated phospho-p53 + phosphorylation – dephosphorylation – mono-ubiquitinated phospho-p53 with nuclear phospho-Mdm2 complex formation – degradation – deubiquitination:

$$\begin{aligned} \frac{d}{dt}P53_{pn}^u(t) &= k_uP53_{pn}|MDM_{pn}(t) + k_{d_1}P53_{pn}^u|MDM_{pn}(t) + k_{d_u}P53_{pn}^{uu}(t) + a_0P53_n^u(t) \\ &- c_0P53_{pn}^u(t) - k_{a_2}MDM_{pn}(t)P53_{pn}^u(t) - d_4P53_{pn}^u(t) - k_{d_u}P53_{pn}^u(t). \end{aligned} \quad (10)$$

*Double-ubiquitinated p53.* Mono-ubiquitinated p53 with nuclear phospho-Mdm2 complex dissociation with second ubiquitination + dephosphorylation – phosphorylation – effective degradation (summary of downstream dynamics of p53 poliubiquitination and degradation, see main text for further explanation) – deubiquitination:

$$\frac{d}{dt}P53_n^{uu}(t) = k_uP53_n^u|MDM_{pn}(t) + c_0P53_{pn}^{uu}(t) - a_0P53_n^{uu}(t) - d_5P53_n^{uu}(t) - k_{d_u}P53_n^{uu}(t). \quad (11)$$

*Double-ubiquitinated phospho-p53.* Mono-ubiquitinated phospho-p53 with nuclear phospho-Mdm2 complex dissociation with second ubiquitination + phosphorylation – dephosphorylation – effective degradation (summary of downstream dynamics of p53 poliubiquitination and degradation, see main text for further explanation) – deubiquitination:

$$\frac{d}{dt}P53_{pn}^{uu}(t) = k_uP53_{pn}^u|MDM_{pn}(t) + a_0P53_n^{uu}(t) - c_0P53_{pn}^{uu}(t) - d_5P53_{pn}^{uu}(t) - k_{d_u}P53_{pn}^{uu}(t). \quad (12)$$

*Cytoplasmic Mdm2.* Translation + dephosphorylation + activation by Nutlin dissociation – phosphorylation (dependent on  $AKT_p$ ) – degradation – inactivation by Nutlin binding:

$$\begin{aligned} \frac{d}{dt}MDM(t) &= t_0MDM_{RNA}(t) + c_1MDM_p(t) + k_{d_3}MDM_i(t) \\ &- a_1MDM(t)AKT_p(t) - d_0MDM(t) - k_{a_3}MDM(t)NUT(t). \end{aligned} \quad (13)$$

*Cytoplasmic phospho-Mdm2.* Phosphorylation (dependent on  $AKT_p$ ) + import from nucleus + activation by Nutlin dissociation – dephosphorylation – export to nucleus – degradation – inactivation by Nutlin binding:

$$\begin{aligned} \frac{d}{dt}MDM_p(t) &= a_1MDM(t)AKT_p(t) + e_0MDM_{pn}(t) + k_{d_3}MDM_{pi}(t) \\ &- c_1MDM_p(t) - i_0MDM_p(t) - d_0MDM_p(t) - k_{a_3}MDM_p(t)NUT(t). \end{aligned} \quad (14)$$

*Nuclear phospho-Mdm2.* Nuclear import + activation by Nutlin dissociation – degradation – nuclear export – deactivation by Nutlin binding – complex formation with p53 or phospho-p53 – complex formation with mono-ubiquitinated p53 and phospho-p53 + complex with p53 or phospho-p53 dissociation (with or without ubiquitination) + complex with mono-ubiquitinated p53 or mono-ubiquitinated

phospho-p53 dissociation (with or without ubiquitination).

$$\begin{aligned}
\frac{d}{dt}MDM_{pn}(t) = & i_0MDM_p(t) + k_{d_3}MDM_{pni}(t) \\
& - d_0MDM_{pn}(t) - e_0MDM_{pn}(t) - k_{a_3}NUT(t)MDM_{pn}(t) \\
& - k_{a_1}MDM_{pn}(t)P53_n(t) - k_{a_2}MDM_{pn}(t)P53_{pn}(t) \\
& - k_{a_1}MDM_{pn}(t)P53_n^u(t) - k_{a_2}MDM_{pn}(t)P53_{pn}^u(t) \\
& + (k_u + k_{d_1})P53_n|MDM_{pn}(t) + (k_u + k_{d_1})P53_{pn}|MDM_{pn}(t) \\
& + (k_u + k_{d_1})P53_n^u|MDM_{pn}(t) + (k_u + k_{d_1})P53_{pn}^u|MDM_{pn}(t).
\end{aligned} \tag{15}$$

## Equations of the PTEN-PIP3-Akt module

*PTEN transcript.* Transcription – degradation:

$$\frac{d}{dt}PTEN_{RNA}(t) = s_1G_{PTEN}(t) - d_7PTEN_{RNA}(t). \tag{16}$$

*Cytoplasmatic PTEN.* Translation – degradation:

$$\frac{d}{dt}PTEN(t) = t_1PTEN_{RNA}(t) - d_1PTEN(t). \tag{17}$$

*Active PIP3.* Activation – deactivation:

$$\frac{d}{dt}PIP_p(t) = a_2(PIP_{tot} - PIP_p(t)) - c_2PTEN(t)PIP_p(t). \tag{18}$$

*Active Akt.* Activation – deactivation:

$$\frac{d}{dt}AKT_p(t) = a_3(AKT_{tot} - AKT_p(t))PIP_p(t) - c_3AKT_p(t). \tag{19}$$
